# Supplementary material for: Spontaneous racemic resolution – towards control of molecular recognition nature
Source: Royal Society of Chemistry journal article supplement (doi:10.1039/c3ce40778k), 2013-01-01
Supplement: c3ce40778k.pdf [file c3ce40778k.pdf]

Supplementary Information

## Spontaneous racemic resolution – towards control of molecular recognition nature

Agata Bialońska\* and Zbigniew Ciunik

Faculty of Chemistry, University of Wrocław, F. Curie-Joliot 14, 50-383 Wrocław, PL

### Table of contents:

#### Experimental procedures

##### 1.1. Synthesis of *N*-(3,5-dinitrobenzoyl)asparagine

**Fig. S1.** The IR spectra for racemic (upper) and chiral (lower) *N*-(3,5-dinitrobenzoyl)asparagine in nujol mull (infrared spectra were recorded with a Bruker 113v FTIR spectrometer). The IR spectra were recorded for *N*-(3,5-dinitrobenzoyl)asparagine precipitating from ethanol solution.

**Fig. S2.** The CD spectra for aqueous solution of *N*-(3,5-dinitrobenzoyl)-D- (dark blue) and *N*-(3,5-dinitrobenzoyl)-L-asparagine (green) ( $c = 0.001$  M,  $d = 0.1$  mm)

##### 1.2. Racemic resolution of *N*-(3,5-dinitrobenzoyl)asparagine

##### 1.3. X-Ray diffraction studies (mono- and polycrystalline samples)

**Table S1.** Crystal data for strychninium and brucinium salts with *N*-(3,5-dinitrobenzoyl)asparagine.

**Table S2.** Geometry of hydrogen bonds in **DNBN-rac**, **DNBN-e** and **DNBN-ssr**.

**Fig. S3.** Packing of a) strychninium *N*-(3,5-dinitrobenzoyl)-D-asparaginate 1.75-hydrate, b) strychninium *N*-(3,5-dinitrobenzoyl)-L-asparaginate pentahydrate, c) brucinium *N*-(3,5-dinitrobenzoyl)-D-asparaginate ethanol solvate hydrate and d) brucinium *N*-(3,5-dinitrobenzoyl)-L-asparaginate methanol 1.25-solvate 1.5-hydrate.

**Fig. S4** Hydrogen bonded *N*-(3,5-dinitrobenzoyl)-D-asparaginate anions in the first ((a) and (c)) and *N*-(3,5-dinitrobenzoyl)-L-asparaginate anions in the following fractions ((b) and (d)) obtained during racemic resolution of *N*-(3,5-dinitrobenzoyl)asparagine by using strychnine ((a) and (b)) and brucine ((c) and (d)).

##### 1.4. Thermogravimetric analysis.

**Fig. S5.** DTA-TG curves showing a comparison of stability of enantiomer (**DNBN-e**), conglomerate (**DNBN-srr**) and racemate (**DNBN-rac**) of *N*-(3,5-dinitrobenzoyl)asparagine (**DNBN-(rac+srr)** represents a mixture of two forms **DNBN-rac** and **DNBN-srr**; number in parenthesis indicates succeeding recrystallizations)

**Fig. S6.** DTA-TG curves for **DNBN-e**.

**Fig. S7.** DTA-TG curves for **DNBN-srr** precipitating from butan-1-ol solution.

**Fig. S8.** DTA-TG curves for **DNBN-srr** recrystallized from butan-1-ol solution.

**Fig. S9.** DTA-TG curves for **DNBN-srr** precipitating from 2-methylpropan-1-ol solution.

**Fig. S10.** DTA-TG curves for **DNBN-srr** precipitating from propan-1-ol solution.

**Fig. S11.** DTA-TG curves for a mixture of **DNBN-rac** and **DNBN-srr** precipitating from ethanol solution.

**Fig. S12.** DTA-TG curves for **DNBN-rac** precipitating aqueous solution.

## Experimental

### 1.1. Synthesis of *N*-(3,5-dinitrobenzoyl)asparagine

Racemic and enantiomeric *N*-(3,5-dinitrobenzoyl)asparagine were synthesized using racemic or enantiomeric asparagine, respectively, and 3,5-dinitrobenzoyl chloride (all the substrates were obtained from commercial source) and applying standard procedures described in literature [J. T. Wróbel, *Preparatyka i elementy syntezy organicznej*, PWN, Warszawa, 1983.]:

$^1\text{H}$  NMR (METHANOL- $d_4$ ):  $\delta$  9.14 (1H, *t*,  $J = 2.1$  Hz), 9.07 (2H, *d*,  $J = 2.1$  Hz), 5.00 (1H, *dd*,  $J = 5.0$  and 7.8 Hz), 2.98 (1H, *dd*,  $J = 5.0$  and 16.0 Hz), 2.89 (1H, *dd*,  $J = 8.0$  and 16.0 Hz) ( $^1\text{H}$  spectra were recorded with a Bruker Avance 500 MHz spectrometer).

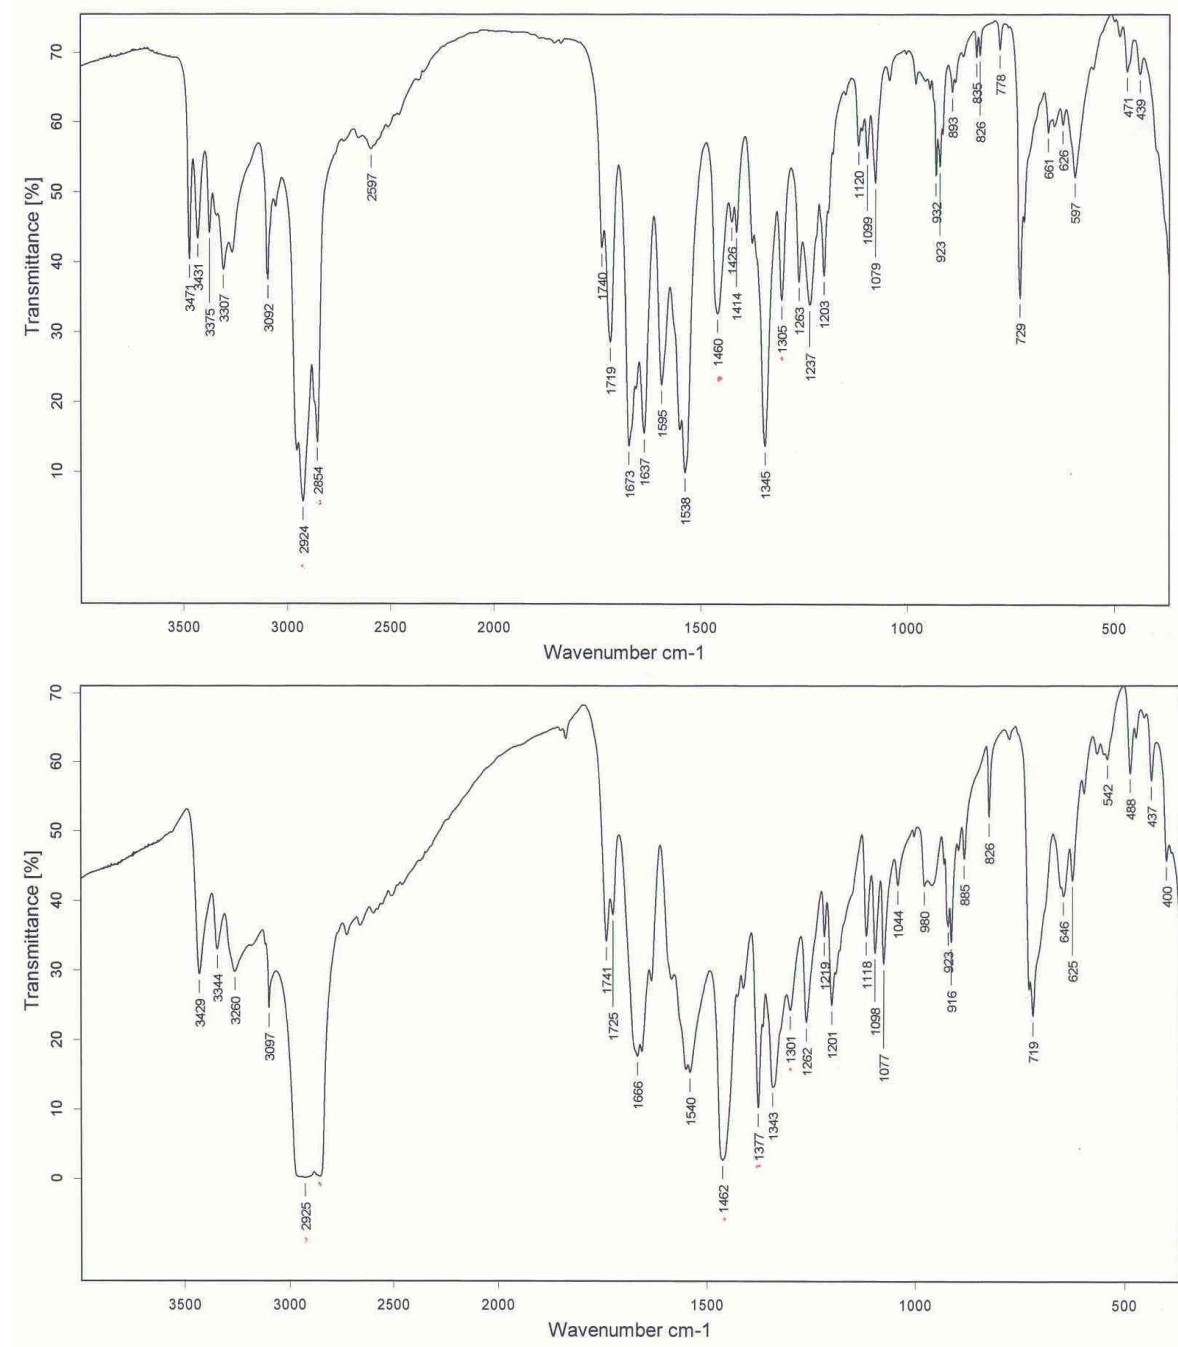

**Fig. S1.** The IR spectra for racemic (upper) and chiral (lower) *N*-(3,5-dinitrobenzoyl)asparagine in nujol mull (infrared spectra were recorded with a Bruker 113v

FTIR spectrometer). The IR spectra were recorded for *N*-(3,5-dinitrobenzoyl)asparagine precipitating from ethanol solution.

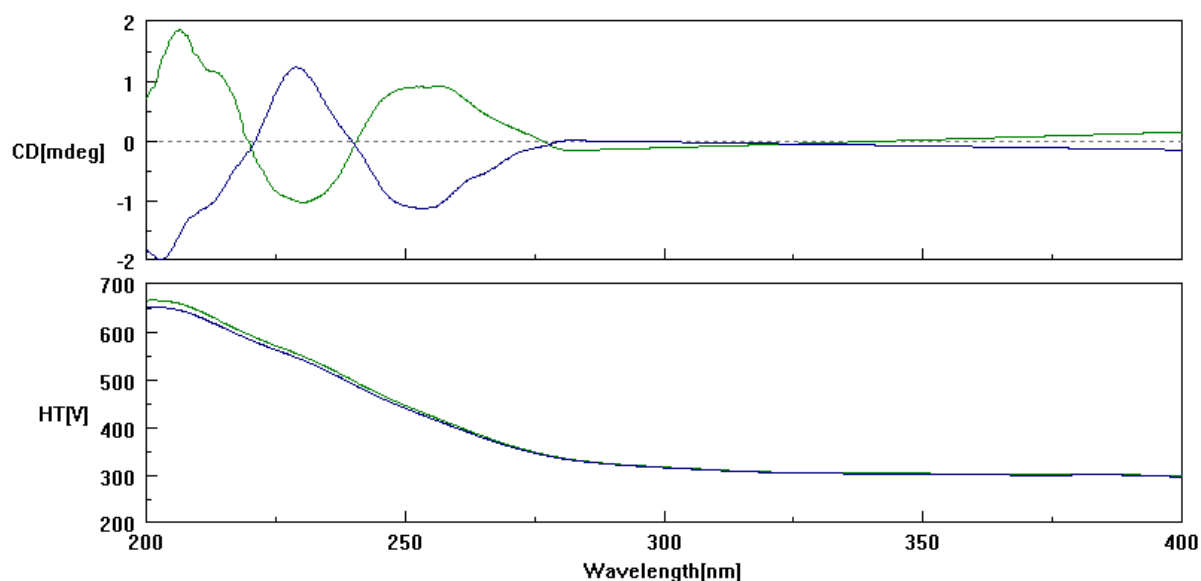

**Fig. S2.** The CD spectra for aqueous solution of *N*-(3,5-dinitrobenzoyl)-D- (dark blue) and *N*-(3,5-dinitrobenzoyl)-L-asparagine (green) ( $c = 0.001$  M,  $d = 0.1$  mm)

100 mg of enantiopure (for crystallization of **DNBN-e**) or racemic (for crystallization of **DNBN-srr** and **DNBN-rac**) *N*-(3,5-dinitrobenzoyl)asparagine were dissolved by heating in 100 ml of a given solvent (water or any of the used (pure for analysis) alcohols). Since solubility of *N*-(3,5-dinitrobenzoyl)asparagine in the other solvents like nitromethane, ethyl acetate or dichloromethane is very low, crystallization using these solvents were performed from saturated solutions obtained by decanting). In further experiments (to avoid a nucleation by a given crystalline phase), basing on the dielectric constant of a given solvent, **DNBN-srr** (obtained from 2-methylpropan-1-ol solution) was used for crystallization of **DNBN-rac**, and **DNBN-rac** (obtained from water solution) was used for crystallization of **DNBN-srr**.

## 1.2. Racemic resolution of *N*-(3,5-dinitrobenzoyl)asparagine by fractional crystallization of brucinium or strychninium diastereomeric salts

Crystals of the strychninium or brucinium diastereomeric salts with *N*-(3,5-dinitrobenzoyl)asparagine were obtained during racemic resolution of *N*-(3,5-dinitrobenzoyl)asparagine by a fractional crystallization of strychninium or brucinium salts. For the racemic resolution purpose, 100 mg of brucine or strychnine (both the anhydrous resolving agents were obtained from commercial source) and equimolar amount of *N*-(3,5-dinitrobenzoyl)asparagine were dissolved in 10 ml of solvent (ethanol or methanol) and the samples were left for crystallization by solvent evaporation at room temperature. Crystals of strychninium *N*-(3,5-dinitrobenzoyl)-D-asparaginate 1.75-hydrate (**SDNBDN(1)**) precipitated from methanol solution as a first fraction of the suitable racemic resolution. A further fraction the racemic resolution is strychninium *N*-(3,5-dinitrobenzoyl)-L-asparaginate 5-hydrate (**SDNBLN(2)**). Brucinium *N*-(3,5-dinitrobenzoyl)-D-asparaginate ethanol solvate hydrate (**BDNBDN(1)**) crystallized from ethanol solution as a first fraction of the racemic resolution of *N*-(3,5-dinitrobenzoyl)asparagine and using brucine as the resolving agent. Crystals of brucinium *N*-(3,5-dinitrobenzoyl)-L-asparaginate methanol 1.2-solvate 1.5-hydrate (**BDNBLN(2)**) precipitated from methanol, which was added (10 ml) after ethanol evaporation. Brucinium *N*-(3,5-dinitrobenzoyl)-L-asparaginate methanol 2.5-solvate (**BDNBLN**)

precipitated from methanol (10 ml) solution containing equimolar amount of brucine (100 mg) and *N*-(3,5-dinitrobenzoyl)-*L*-asparaginate.

### 1.3. X-Ray diffraction studies (mono- and polycrystalline samples)

X-Ray data for **DNBN-rac**, **DNBN-srr** were collected on a Xcalibur PX with Onyx detector (Cu-K $\alpha$  radiation,  $\lambda = 1.54175 \text{ \AA}$ ), for **DNBN-e**, **SDNBDN(1)**, **SDNBLN(2)**, **BDNBDN(1)**, **BDNBLN(2)** – on a Xcalibur with Sapphire2 detector and **BDNBLN** – on a Xcalibur with Ruby detector (Mo-K $\alpha$  radiation;  $\lambda = 0.71073 \text{ \AA}$ ). All the data were collected at 100 K using an Oxford Cryosystem device. Data reduction and analysis were carried out with the CrysAlice 'RED' program (CrysAlis 'RED', Oxford Diffraction Ltd., Abingdon, Oxfordshire, England, 2009). The space groups were determined using the XPREP program. Structures were solved by direct methods using the SHELXS (G. M. Sheldrick, *Acta Cryst.*, 2008, **A64**, 112) or SIR2004 (M. C. Burla, R. Caliendo, M. Camalli, B. Carrozzini, G. L. Cascarano, L. De Caro, C. Giacovazzo, G. Polidori and R. Spagna, *J. Appl. Cryst.* 2005, **38**, 381) program and refined using all  $F^2$  data, as implemented by the SHELXL program. Non-hydrogen atoms were refined with anisotropic displacement parameters. In **BDNBLN(2)** and in **BDNBLN** some restraints were applied for disordered units (anions and methanol molecules). All H atoms were found in  $\Delta\rho$  maps or placed at calculated positions. Before the last cycle of refinement all H atoms were fixed and were allowed to ride on their parent atoms. The absolute structures were chosen on the basis of the known absolute configuration of strychnine (J. H. Robertson and C. A. Beevers, *Acta Crystallogr.*, 1951, **4**, 270) or brucine (F. Toda, K. Tanaka, H. Ueda and T. Oshima, *Isr. J. Chem.* 1985, **25**, 338–345.), respectively.

PXRD patterns were recorded on D8 ADVANCE with Vantec detector (Cu-K $\alpha$  radiation,  $\lambda = 1.54175 \text{ \AA}$ ).

### 1.4. Thermogravimetric analysis.

The TGA and DTA measurements were performed for freshly prepared polycrystalline samples (the crystalline phase was previously confirmed by the PXRD studies) on a Setaram SETSYS 16/18 instrument between 303 and 773 K with a ramp rate of  $2 \text{ Kmin}^{-1}$ . The scan was performed in flowing nitrogen (flow rate:  $1 \text{ dm}^3 \cdot \text{h}^{-1}$ )

**Table S1.** Crystal data for strychninium and brucinium salts with *N*-(3,5-dinitrobenzoyl)asparagine.

|                                                                                                                   | <b>SDNBDN(1)</b>                                                       | <b>SDNBLN(2)</b>                                                       | <b>BDNBDN(1)</b>                                                                    | <b>BDNBLN(2)</b>                                                                | <b>BDNBLN</b>                                           |
|-------------------------------------------------------------------------------------------------------------------|------------------------------------------------------------------------|------------------------------------------------------------------------|-------------------------------------------------------------------------------------|---------------------------------------------------------------------------------|---------------------------------------------------------|
| chemical formula*                                                                                                 | SH <sup>+</sup> N <sup>-</sup><br>·1.75H <sub>2</sub> O                | SH <sup>+</sup> N <sup>-</sup> ·5H <sub>2</sub> O                      | BH <sup>+</sup> N <sup>-</sup><br>·C <sub>2</sub> H <sub>6</sub> O·H <sub>2</sub> O | BH <sup>+</sup> N <sup>-</sup><br>·1.2CH <sub>4</sub> O<br>·1.5H <sub>2</sub> O | BH <sup>+</sup> N <sup>-</sup><br>·2.5CH <sub>4</sub> O |
| Chemical formula weight                                                                                           | 692.16                                                                 | 750.71                                                                 | 784.77                                                                              | 785.76                                                                          | 800.79                                                  |
| temperature (K)                                                                                                   | 100(2)                                                                 | 100(2)                                                                 | 100(2)                                                                              | 100(2)                                                                          | 100(2)                                                  |
| Cell setting, space group                                                                                         | orthorhombic,<br><i>P</i> 2 <sub>1</sub> 2 <sub>1</sub> 2 <sub>1</sub> | orthorhombic,<br><i>P</i> 2 <sub>1</sub> 2 <sub>1</sub> 2 <sub>1</sub> | monoclinic,<br><i>P</i> 2 <sub>1</sub>                                              | monoclinic,<br><i>C</i> 2                                                       | triclinic, <i>P</i> 1                                   |
| <i>a</i> , <i>b</i> , <i>c</i> (Å)                                                                                | 8.006(2)<br>11.184(3)<br>34.465(5)                                     | 7.730(2)<br>11.896(3)<br>37.812(5)                                     | 12.358(3)<br>8.354(2)<br>18.078(2)                                                  | 38.752(5)<br>12.287(3)<br>7.909(2)                                              | 7.924(2)<br>12.140(3)<br>20.495(3)                      |
| <i>β</i> (°)                                                                                                      | 90.00<br>90.00<br>90.00                                                | 90.00<br>90.00<br>90.00                                                | 90<br>101.94(3)<br>90                                                               | 90<br>100.63(3)<br>90                                                           | 73.21(2)<br>79.37(2)<br>80.53(3)                        |
| <i>V</i> (Å <sup>3</sup> )                                                                                        | 3086.0(12)                                                             | 3477.0(13)                                                             | 1826.0(7)                                                                           | 3701.2(14)                                                                      | 1842.1(8)                                               |
| <i>Z</i>                                                                                                          | 4                                                                      | 4                                                                      | 2                                                                                   | 4                                                                               | 2                                                       |
| <i>D</i> <sub>c</sub> (Mg m <sup>-3</sup> )                                                                       | 1.490                                                                  | 1.434                                                                  | 1.427                                                                               | 1.410                                                                           | 1.444                                                   |
| Crystal form, colour                                                                                              | plate,<br>colorless                                                    | block,<br>colorless                                                    | plate, orange                                                                       | plate, colorless                                                                | plate,<br>colorless                                     |
| <i>R</i> [ <i>F</i> <sup>2</sup> > 2σ( <i>F</i> <sup>2</sup> )],<br><i>wR</i> ( <i>F</i> <sup>2</sup> ), <i>S</i> | 0.068, 0.149,<br>1.082                                                 | 0.049, 0.108,<br>1.038                                                 | 0.077, 0.196,<br>1.037                                                              | 0.069, 0.120,<br>0.871                                                          | 0.063,<br>0.110,<br>0.846                               |
| CCDC                                                                                                              | 933059                                                                 | 933060                                                                 | 933061                                                                              | 933062                                                                          | 933063                                                  |

SH<sup>+</sup> = C<sub>21</sub>H<sub>23</sub>N<sub>2</sub>O<sub>2</sub>, BH<sup>+</sup> = C<sub>23</sub>H<sub>27</sub>N<sub>2</sub>O<sub>4</sub>, N<sup>-</sup> = C<sub>11</sub>H<sub>9</sub>N<sub>4</sub>O<sub>8</sub>

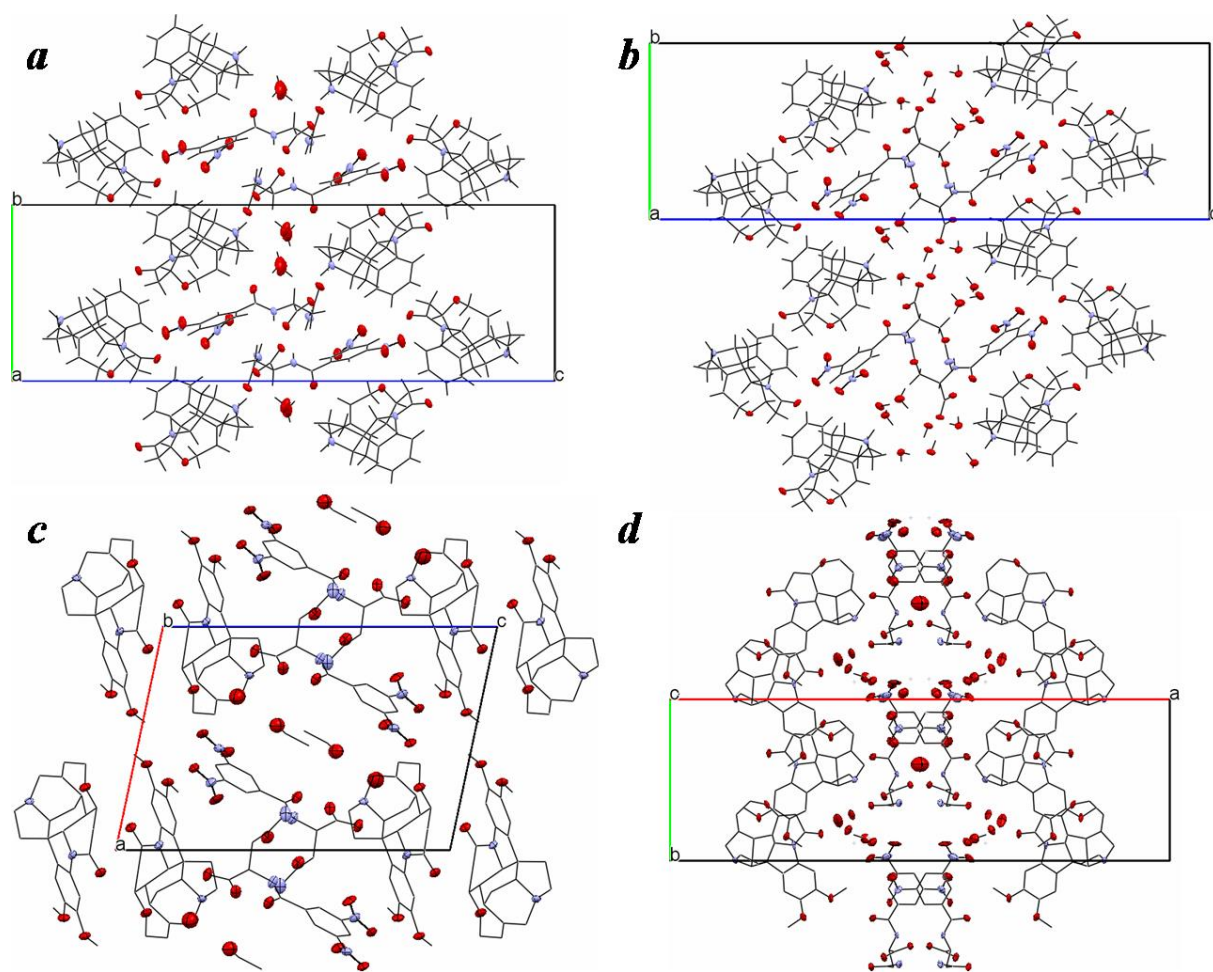

**Fig. S3.** Packing of a) strychninium *N*-(3,5-dinitrobenzoyl)-*D*-asparaginate 1.75-hydrate, b) strychninium *N*-(3,5-dinitrobenzoyl)-*L*-asparaginate pentahydrate, c) brucinium *N*-(3,5-dinitrobenzoyl)-*D*-asparaginate ethanol solvate hydrate and d) brucinium *N*-(3,5-dinitrobenzoyl)-*L*-asparaginate methanol 1.25-solvate 1.5-hydrate.

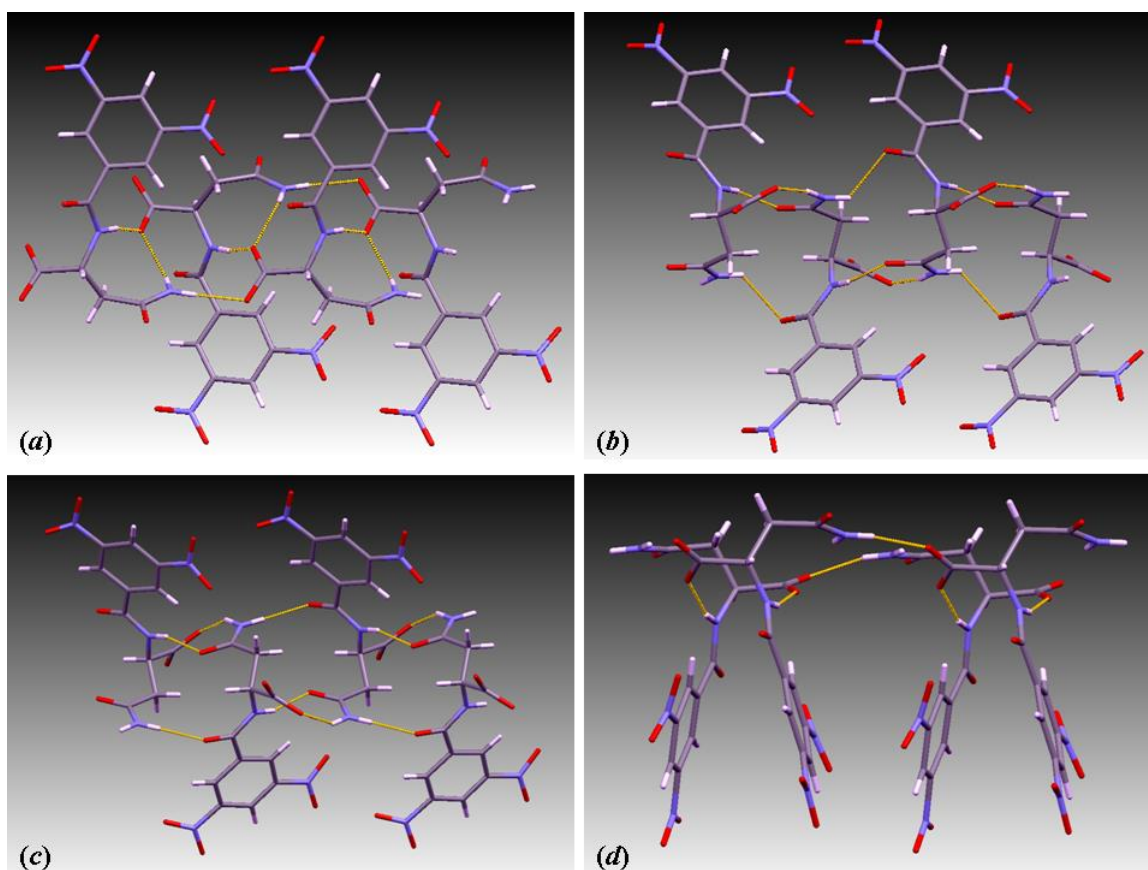

**Fig. S4.** Hydrogen bonded *N*-(3,5-dinitrobenzoyl)-D-asparaginate anions in the first ((a) and (c)) and *N*-(3,5-dinitrobenzoyl)-L-asparaginate anions in the following fractions ((b) and (d)) obtained during racemic resolution of *N*-(3,5-dinitrobenzoyl)asparagine by using strychnine ((a) and (b)) and brucine ((c) and (d)).

**Table S2.** Geometry of hydrogen bonds in **DNBN-rac**, **DNBN-e** and **DNBN-ssr**.

| DNBN-rac                     |          |          | DNBN-e                     |          |          | DNBN-ssr                   |          |          |
|------------------------------|----------|----------|----------------------------|----------|----------|----------------------------|----------|----------|
| DHA                          | D...A    | ∠<br>DHA | DHA                        | D...A    | ∠<br>DHA | DHA                        | D...A    | ∠<br>DHA |
| O1-H1C...O3 <sup>i</sup>     | 2.633(6) | 169      | O1-H1C...O3 <sup>i</sup>   | 2.596(3) | 176      | O1-H1C...O3 <sup>i</sup>   | 2.590(6) | 176      |
| N1-H1A...O1 <sup>ii</sup>    | 3.275(7) | 129      | N1-H1A...O2 <sup>ii</sup>  | 3.017(3) | 142      | N1-H1A...O2 <sup>ii</sup>  | 3.024(7) | 143      |
| N1-H1A...O4 <sup>iii</sup>   | 2.987(7) | 126      | N1-H1B...O4 <sup>iii</sup> | 2.986(3) | 162      | N1-H1B...O4 <sup>iii</sup> | 2.979(7) | 163      |
| N1-H1B...O6 <sup>iv</sup>    | 2.964(8) | 153      | N2-H2B...O3 <sup>iii</sup> | 2.852(3) | 157      | N2-H2A...O3 <sup>iii</sup> | 2.845(7) | 157      |
| N2-H2A...O3 <sup>v</sup>     | 2.904(8) | 151      |                            |          |          |                            |          |          |
| C11-H11A...O2 <sup>iii</sup> | 3.255(7) | 161      |                            |          |          |                            |          |          |

**Symmetry codes for DNBN-rac:** (i)  $x+1, -y+3/2, z+1/2$ ; (ii)  $x-1, -y+3/2, z-1/2$ ; (iii)  $x, -y+3/2, z-1/2$ ; (iv)  $-x+3, y-1/2, -z+1/2$ ; (v)  $5x+1, y, z$ ; **DNBN-e:** (i)  $-x+1, y+1/2, -z+1/2$ ; (ii)  $-x+2, y-1/2, -z+1/2$ ; (iii)  $-x+2, y+1/2, -z+1/2$ ; **DNBN-ssr:** (i)  $-x+1, y+1/2, -z+1/2$ ; (ii)  $-x, y-1/2, -z+1/2$ ; (iii)  $-x, y+1/2, -z+1/2$

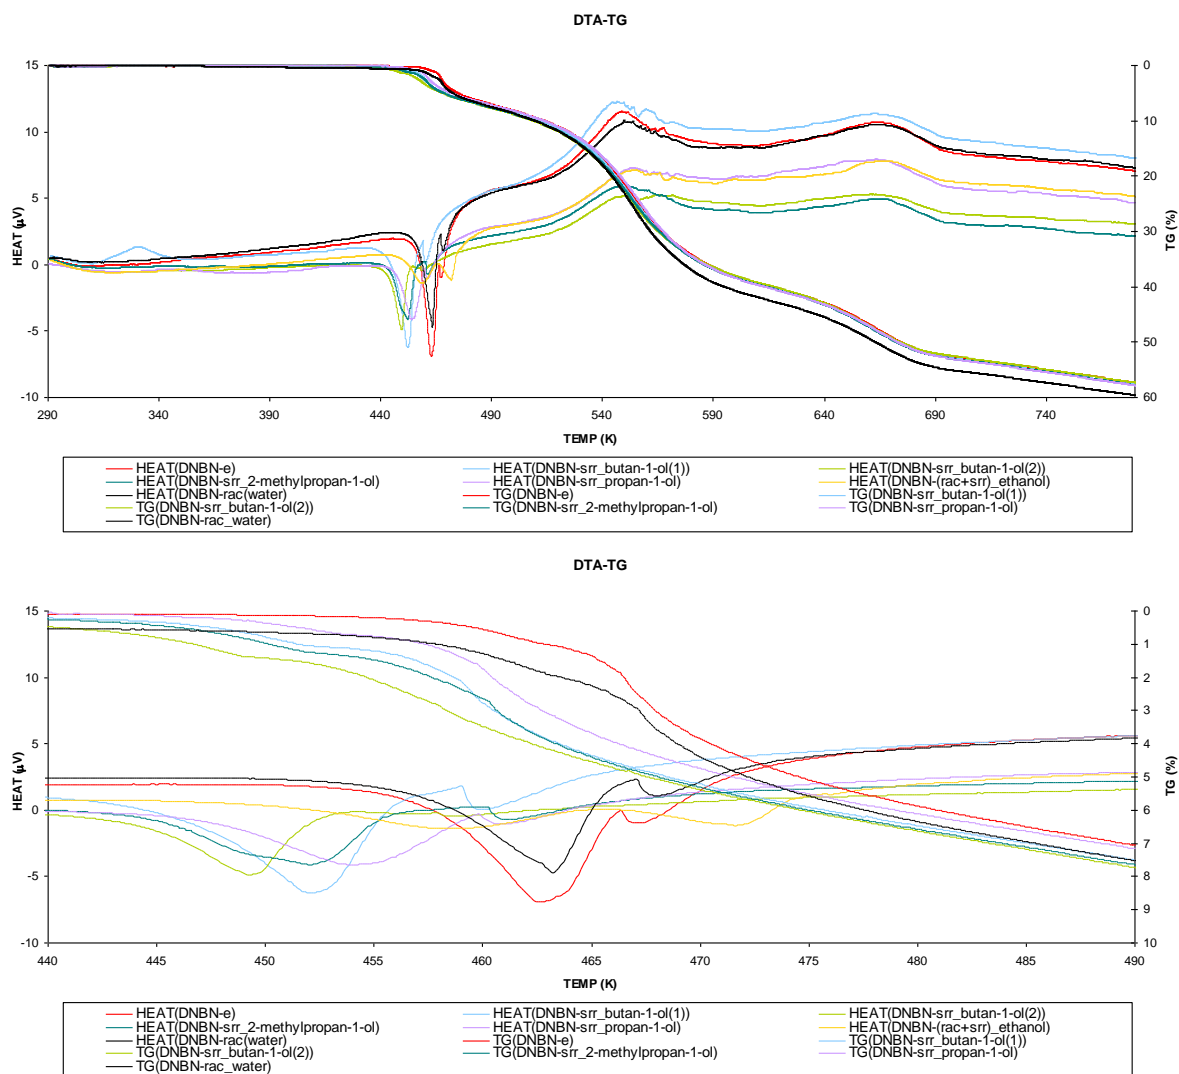

**Fig. S5.** DTA-TG curves showing a comparison of stability of enantiomer (**DNBN-e**), conglomerate (**DNBN-srr**) and racemate (**DNBN-rac**) of *N*-(3,5-dinitrobenzoyl)asparagine (**DNBN-(rac+srr)** represents a mixture of two forms **DNBN-rac** and **DNBN-srr**; number in parenthesis indicates succeeding recrystallizations)

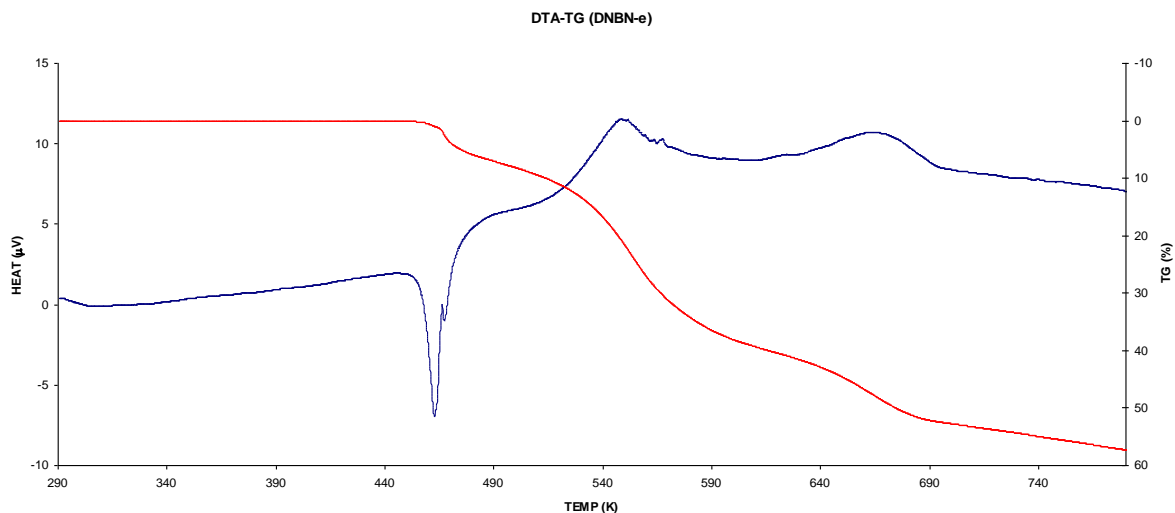



**Fig. S6.** DTA-TG curves for DNBN-e.

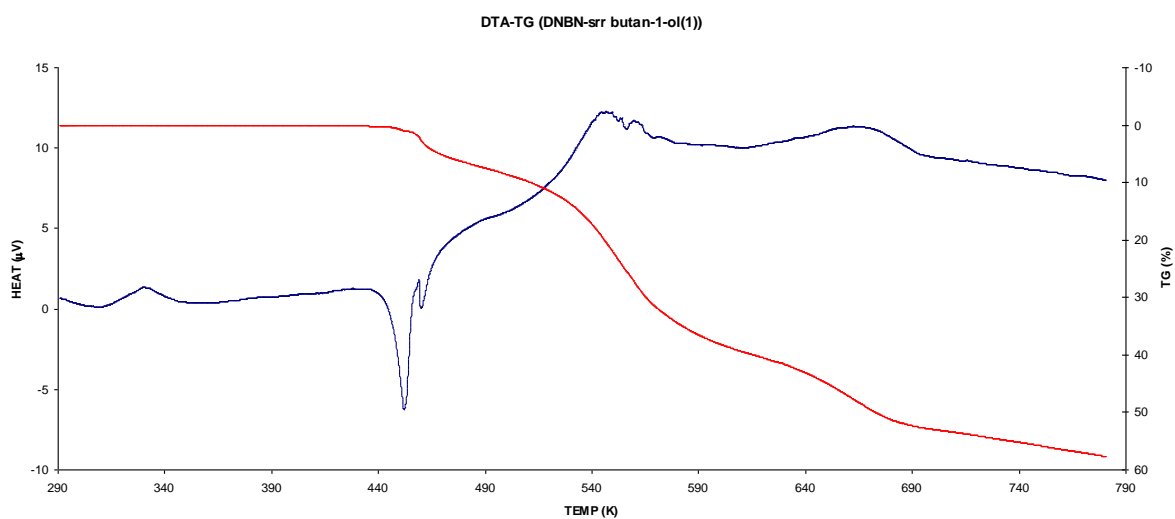

**Fig. S7.** DTA-TG curves for DNBN-srr precipitating from butan-1-ol solution.

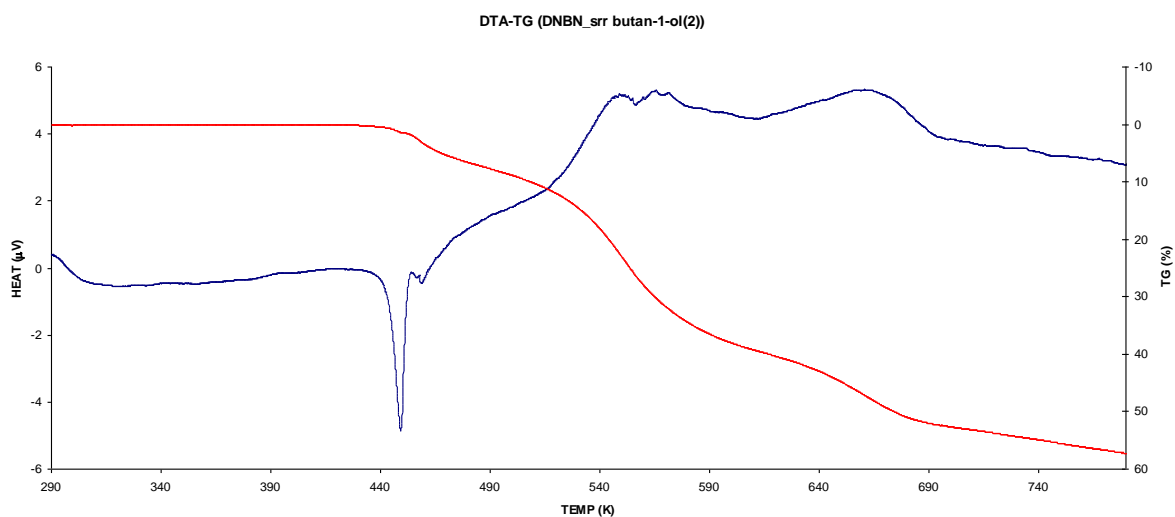

**Fig. S8.** DTA-TG curves for DNBN-srr recrystallized from butan-1-ol solution.

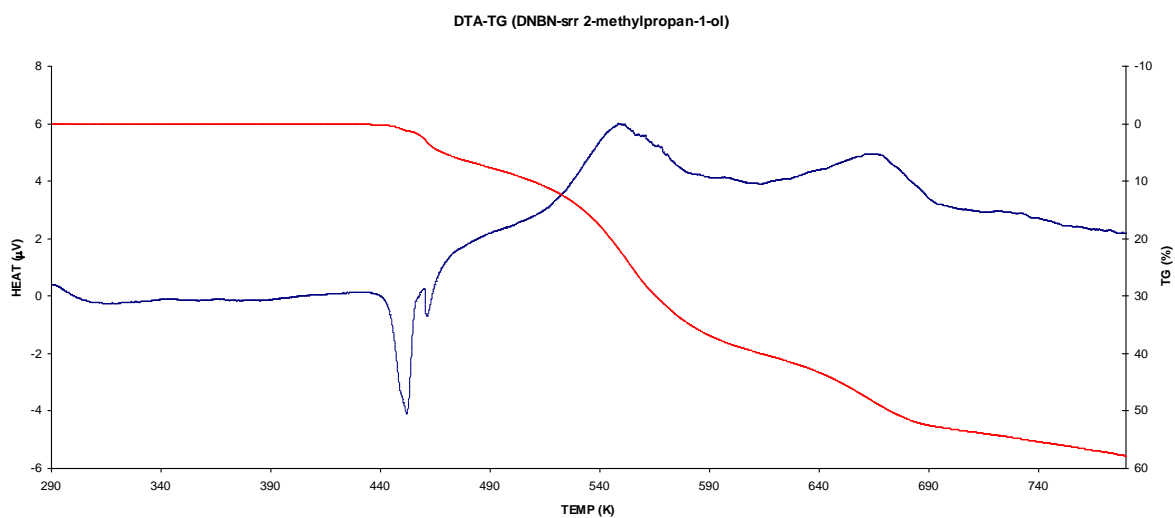

**Fig. S9.** DTA-TG curves for DNBN-srr precipitating from 2-methylpropan-1-ol solution.

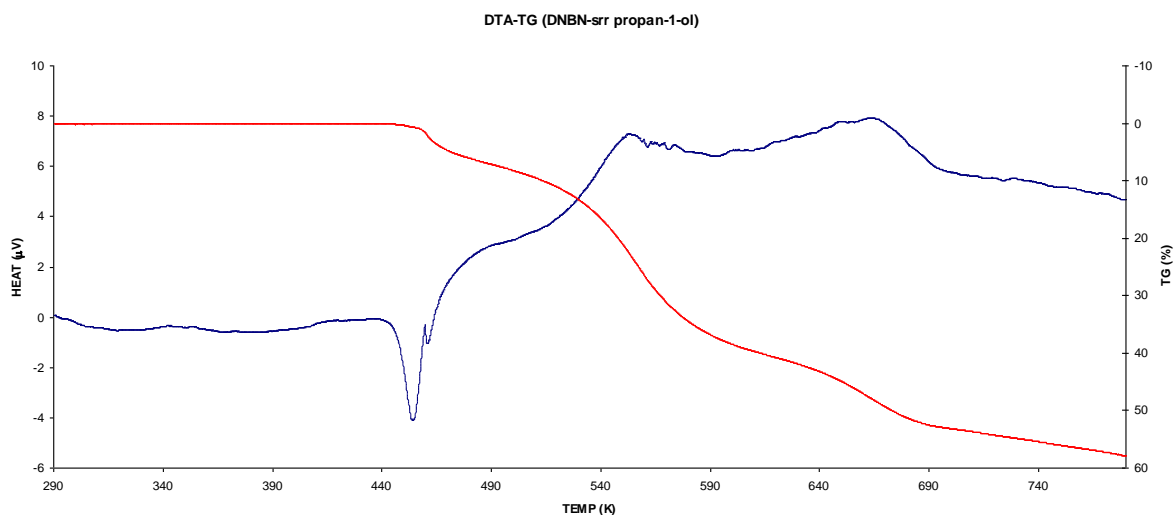

**Fig. S10.** DTA-TG curves for DNBN-srr precipitating from propan-1-ol solution.

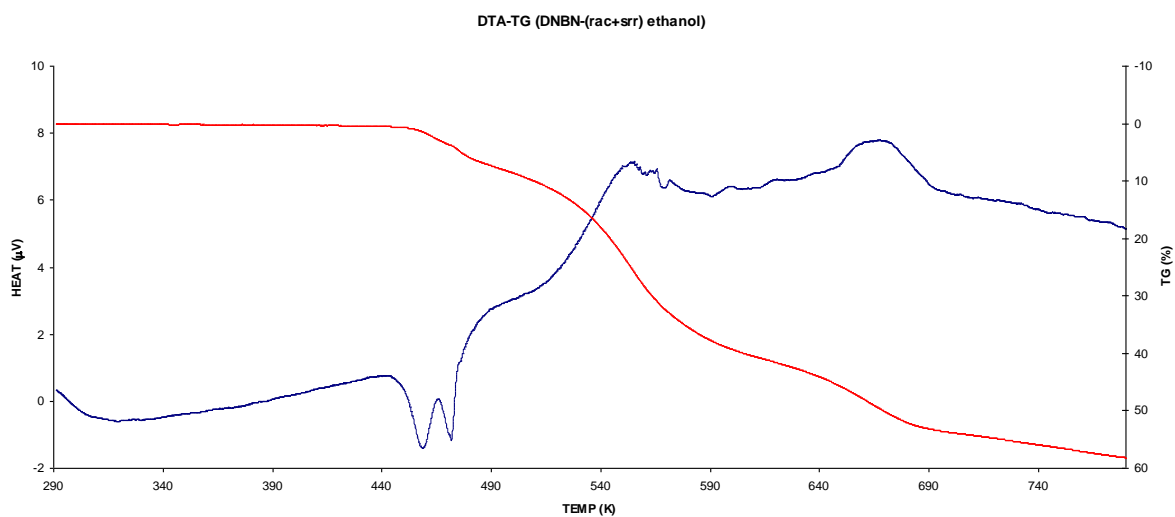

**Fig. S11.** DTA-TG curves for a mixture of DNBN-rac and DNBN-srr precipitating from ethanol solution.

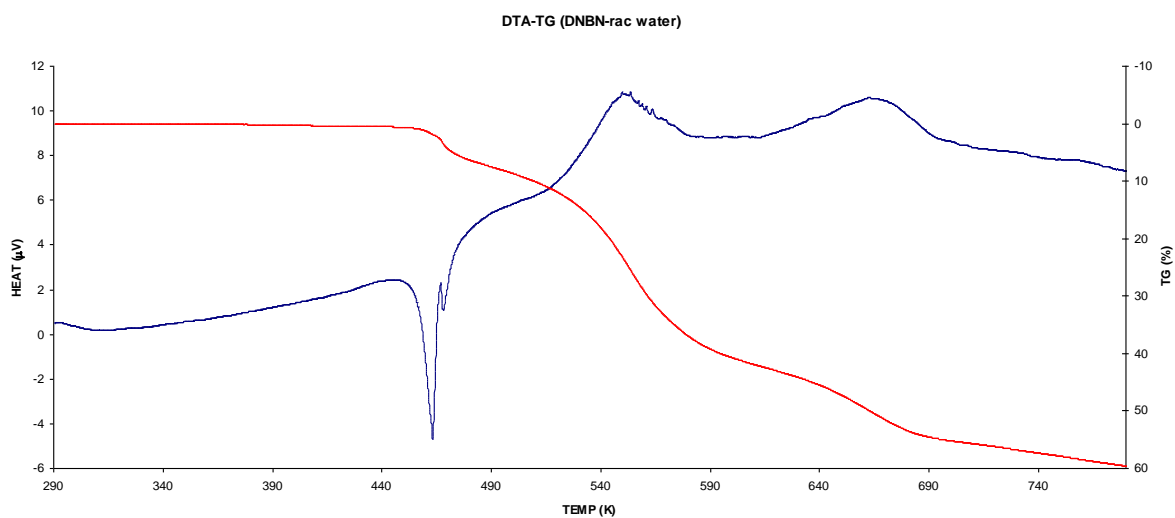

**Fig. S12.** DTA-TG curves for DNBN-rac precipitating aqueous solution.
